# Supplementary material for: Consequences of excessive glucosylsphingosine in glucocerebrosidase-deficient zebrafish
Source: PubMed Central journal article supplement — J Lipid Res. 2022 Mar 18;63(5):100199. doi: 10.1016/j.jlr.2022.100199 (PMC9058576; doi:10.1016/j.jlr.2022.100199), 2022-03-18
Supplement: mmc1.pdf [file mmc1.pdf]

## Supplemental data

**Supplemental Table 1** | Forward (F) and reverse (R) primers for molecular cloning, HRM analysis, sequencing and RT-PCR analysis.

| Target        | Note            | Forward primer sequence (5'→3')                              | Reverse primer sequence (5'→3')                           |        |
|---------------|-----------------|--------------------------------------------------------------|-----------------------------------------------------------|--------|
| <i>asah1a</i> | Gateway cloning | GGGGACAAGTTTGTACAAAAAAGCAGGC<br>TACCACCATGAAGCTTGTGTTCCGTTAC | GGGGACCACTTTGTACAAGAAAGCTGGGT<br>cTTACCATGGTGTGCATGGATTTG |        |
| <i>asah1b</i> | Gateway cloning | GGGGACAAGTTTGTACAAAAAAGCAGGC<br>TACCACCATGAACAACAGATTAAACCTG | GGGGACCACTTTGTACAAGAAAGCTGGGT<br>cTCACCAGGGCATGCAGGGATTTG |        |
| <i>asah1a</i> | HRM             | GTCTAGACTCGAATAAGTTCATG                                      | TGGGAAACAGTTACCTCTGTG                                     |        |
| <i>asah1b</i> | HRM             | TGCAAAGAGATGTGTTAGATTG                                       | TCCTTCAGATGGCGAGCATG                                      |        |
| <i>asah1a</i> | Sequencing      | TGGGATGTATCCACCTAAAGG                                        | Same as HRM Rev                                           |        |
| <i>asah1b</i> | Sequencing      | CAGCAAGCAAAGATGGACAG                                         | TACGATTTTGGGAGATTTATCTC                                   |        |
|               | NCBI code       |                                                              |                                                           |        |
| <i>asah1a</i> | NM_001006088    | ATTAGGCCTGGTGAAGTGC                                          | CTGCGAGTAAGAAAACCCGTC                                     | 125 bp |
| <i>asah1b</i> | NM_200577       | TGGACTGTTTCATGGGATGGG                                        | CCGGTCAACATCCCGACATA                                      | 150 bp |
| <i>gpnmb</i>  | XM_009294247    | GCAAGGGCGTAGAATTGAAA                                         | TGGCAGGGACATGTCAGTAA                                      |        |
| <i>chia.6</i> | NM_199603       | TCCACGGCTCATGGGAGAGTGTC                                      | AGCGCCCTGATCTCGCCAGT                                      | (73)   |
| <i>catD</i>   | NM_131710       | TGGGTGGAAAGGTCTACTCG                                         | CACTCAGGCAGATGTCGTGT                                      |        |
| <i>il1β</i>   | NM_212844       | TGGACTTCGCAGCACAAAATG                                        | GTTCACTTCACGCTCTTGGATG                                    | (74)   |
| <i>tnfβ*</i>  | NM_001024447    | GCATGTGATGAAGCCAAACG                                         | GATTGTCCTGAAGGGTCACC                                      | (75)   |
| <i>apoeb</i>  | NM_131098       | AAACTGACATGACCGACGCT                                         | TAGGTTGCTACGGTGTTCGG                                      | 172 bp |
| <i>c1qa</i>   | NM_001020527    | CTCTGTTTCCCTTTTCCTTCTG                                       | CTTTCTCTCCTTTTGGTCTGG                                     | 108 bp |
| <i>c3a.1</i>  | NM_131242       | CGCTGCACAAAGTACTTCCAC                                        | GCCAGCTCCATGTCCTTGAC                                      | 197 bp |
| <i>c5aR1</i>  | XM_005159274    | CCGACAAGCTCGCATCCTAT                                         | GCGAATGATGGTTATCGCCC                                      | 163 bp |
| <i>c5</i>     | XM_001919191    | CAAGGCCACGGTTCAATCAG                                         | TCTTCATGCTTTTCGGCAGTCA                                    | 152 bp |
| <i>th1</i>    | NM_131149       | AGCTTTGTGGACGCTACTGA                                         | GTGGGTTGTCCAGCACTTCT                                      | 112 bp |
| <i>th2</i>    | NM_001001829    | TACAAGCCATTCGACCCAGC                                         | ATGCTGCAAGTGTAGGGGTC                                      | 173 bp |
| <i>sncβ</i>   | NM_200969       | GGAGTTTGGTCAGGAAGCCA                                         | CCTCGGGCTCATAATCCTGG                                      | 107 bp |
| <i>sncyα</i>  | NM_001017567    | TGGAGGGGCTGGAGACTATG                                         | AGCATCATGGGACATTCGGTT                                     | 123 bp |
| <i>sncyβ</i>  | NM_001020652    | ATGGTGAACCCGGGTGACTT                                         | AGGCTTTGGAGCAGAAACGTA                                     | 129 bp |

|               |              |                          |                               |        |
|---------------|--------------|--------------------------|-------------------------------|--------|
| <i>mcpa</i>   | XM_002665562 | TGGTCATCTATCCTCCTCTCCA   | CTTTCTCCCAGGCCCAATAGTTCT      | 150 bp |
| <i>efla</i>   |              | CTGGAGGCCAGCTCAAACAT     | ATCAAGAAGAGTAGTACCGCTAGCATTAC | (76)   |
| <i>rpl13a</i> |              | TCTGGAGGACTGTAAGAGGTATGC | AGACGCACAATCTTGAGAGCAG        | (76)   |

---

\* Also known as *tnf- $\alpha$ 2*

|             |                                                                       |     |
|-------------|-----------------------------------------------------------------------|-----|
| Human ACase | MPGRSCVALV-LLAAAVSCAVAQHAPPWTEDCRKSTYPPSPGPTYRGAVPWYTIINLDDLPPY       | 59  |
| Asah1a      | ---MKLVFRYNALFISIFIALYV-QGLEDCRSGMYPPKGPTRYRGNVTRYTVNLDLPPS           | 55  |
| Asah1b      | MNNRNLNLCFFI-LSYCMCLSAQYVFPFTEDCRSGMYPPNGPTFKGDVSWYTVDDLPPAS          | 59  |
|             | : : * :. ****. ***.***:* * **::****                                   |     |
| Human ACase | KRWHELMLDKAPVLRKVIIVNSLKNMINTFVPSGKIMQVVDEKLPGLLGNFPGPFEEEMKGI        | 119 |
| Asah1a      | ERWTQIIKDKNTELEIMVQTIKDMAKGFH-HGKLVNFVDKELPFIVDTLPNPFNEEIKGI          | 114 |
| Asah1b      | KRWTDVISDKKTEMASMIQAIRDLADAFVPSGKLIQLVDKDLPLMVDTLPLYPFNEEIRGI         | 119 |
|             | :** ::: * : : : : : : . * . ***::.**.* ** : : : * **::**              |     |
|             | <u>α-subunit helix</u>                                                |     |
| Human ACase | AAVTDIPLGELIISFNIFYELFTICTSIVAEDKKGHLIHGRNMDFGVFLGWNINNDTWVIT         | 179 |
| Asah1a      | AAVSGIPLGELIALFNIFYEVFTVCTSLVAEDNNGNIYHGRNLDFGLFMGWRQNKWTTLT          | 174 |
| Asah1b      | ASVSGVPLGEVVLFNIFYEVFTVCTSLVAEDVNGNLIHARNLDFGLFMGWDLKNRSWVIT          | 179 |
|             | *:::****: *****:**:**:**:*** :::: *.**.***:*:**: * : : *              |     |
|             | <u>β-subunit region</u>                                               |     |
| Human ACase | EQLKPLTVNLDFQRNKTQVFKASSFAGYVGLTGFKPGLESLTLNERFSINGGYLGILEW           | 239 |
| Asah1a      | EKLKPLVVNINFERKNQTVFKSTSFAGYVGLTGIRPGELELTMNERFDGDDGYYIGILDW          | 234 |
| Asah1b      | EKLKPLVVNIDFTRNGQTVFKSTNFAGYVGLTGIHQNSFTLTMNERFSLDGGYYIGILEW          | 239 |
|             | *:***.***:* * : : : : : : : : : : : : : : : : : : : : : : : : : : : * |     |
| Human ACase | ILGKKDVMWIGFLTRTVLENSTSYEEAKNLLTKTKILAPAYFILGGNQSSEGCVITRDRK          | 299 |
| Asah1a      | IFGNRDGMWTGFLTRRVLENSTSYEDAKDQLSQTKLLAPVYFILGGNRTGGCVITRTRI           | 294 |
| Asah1b      | ILGKRDMWMSFLTRSVLENATSYESAKALLSDTKLLAPAYFILGGNQSSEACIITRSRT           | 299 |
|             | *:***:* ** .*** **:*:**:**.* * : .**.***.***:*:**:* * : : *           |     |
| Human ACase | ESLDVYELDAKQGRWYVVQTNDRWKHPFLDDRRTPAKMCNRTSQENISFETMYDVLS             | 359 |
| Asah1a      | NTLDIWELEMLGRWYVLETNYDHWKPMFLDDRRTPAKCMNQTTQANISLASIYNVLS             | 354 |
| Asah1b      | QNISPLELVKNGRWYVLETNYDHWKEPLFLDDRRTPAKCMNQTTQTNISVKTVDVLS             | 359 |
|             | : : . ** : *****:****:..*:***** * : : : * *** . : : : **              |     |
| Human ACase | TKPVLNKLTVYTTLLIDVTKGQFETYLRDCPDPCIGW 395                             |     |
| Asah1a      | TKPVLNKLTTYTSLMAVSTGTLESYVRDCPNPCTPW 390                              |     |
| Asah1b      | TKPVLNKLTTYTTLMEVSKGTLESFIRDCPNPCMPW 395                              |     |
|             | *****.***: * : * : : : : : : : : * *                                  |     |

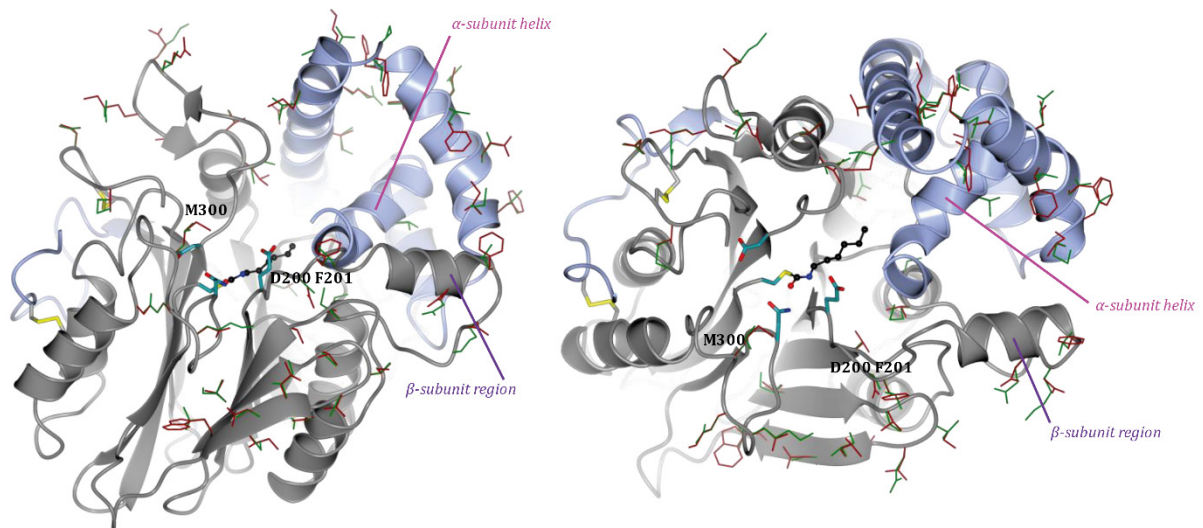

Ribbon diagram of the side (left) or top (right) of human ACCase (PDB 6MHM) with  $\alpha$ -subunit (light grey),  $\beta$ -subunit (dark grey) and disulfide bonds (yellow) indicated. Inhibitor Carmofur (black, ball and stick) and catalytic residues C143, D162, E225 or N320 (cyan sticks) are also visualized for clarity, as proposed by Dementiev et al.(32). Divergent residues of Asah1a (red) and Asah11b (green) surrounding the catalytic pocket are superimposed on the human structure. Only residues Asp 200, Phe 201 and Met 300 of Asah1a, located on the loops adjacent to the catalytic site, might be close enough to be of significance.

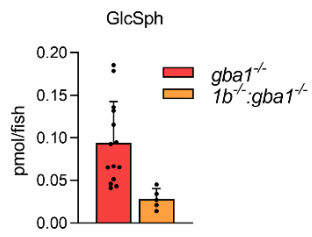

GlcSph levels of  $gba1^{-/-}$  (n = 14) and  $gba1^{-/-}:asah1b^{-/-}$  (n = 5) larvae KO at 5dpf in pmol/fish. Data of  $gba1^{-/-}$  is obtained from (33). Data is depicted as mean  $\pm$  SD.

A.

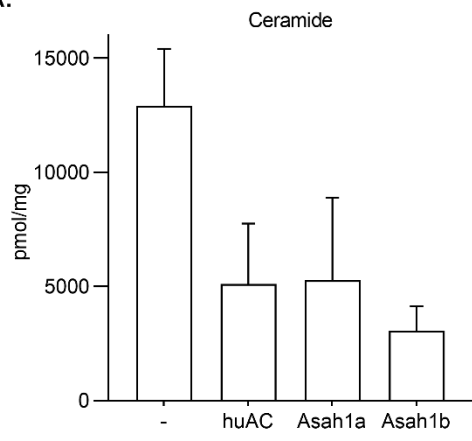

B.

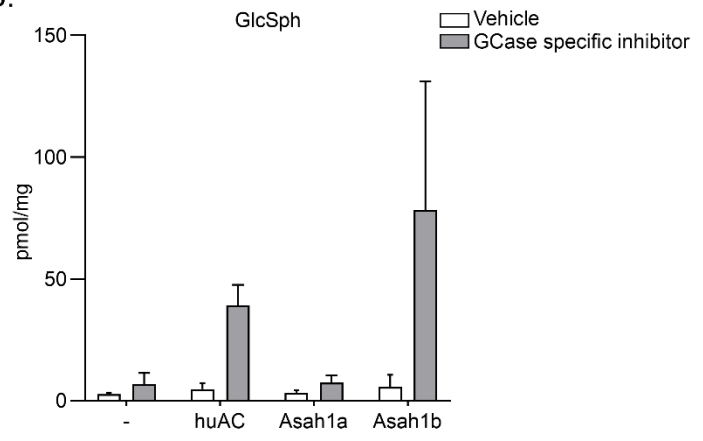

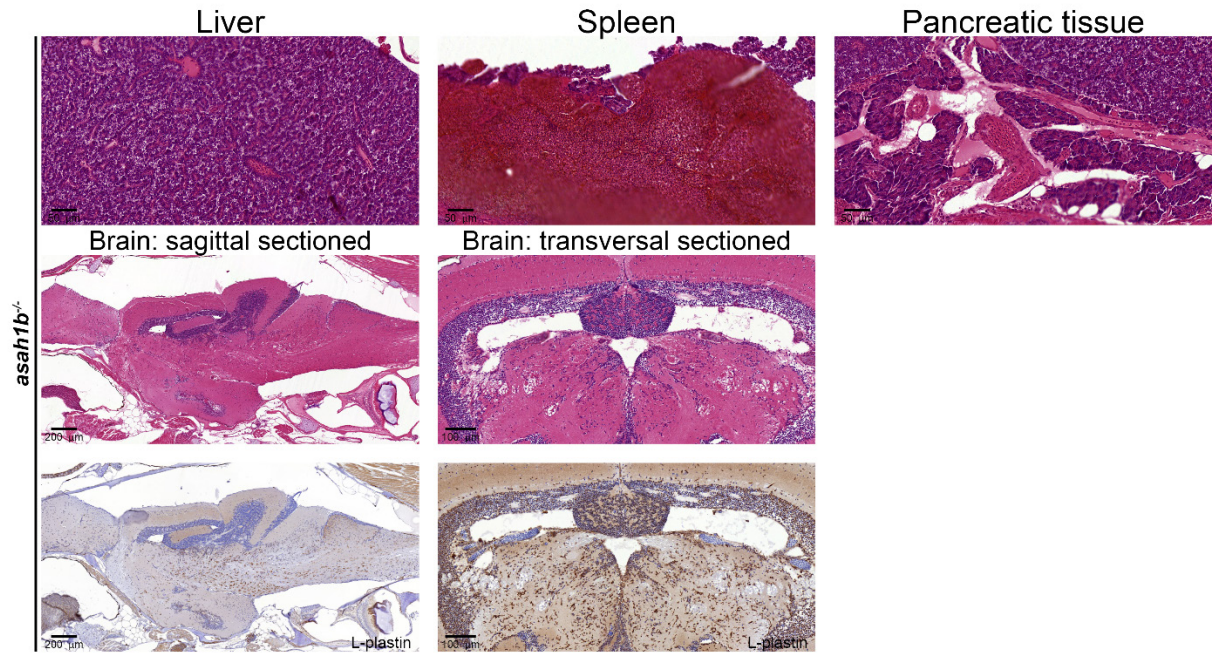

**Supplemental Figure S5:** Histopathology of *asah1b*<sup>-/-</sup> zebrafish including liver, spleen and pancreatic tissue (top panel) as well as sagittal section (left) and transversal section (right panel) of *asah1b*<sup>-/-</sup> zebrafish brain using H&E staining. Bottom panel: immunostaining of L-plastin in sagittal section (left) and transversal section (right) of *asah1b*<sup>-/-</sup> zebrafish brain. Scale bars: 50 µm for top panel, 200 µm and 100 µm for sagittal and transversal sectioned brain, respectively.



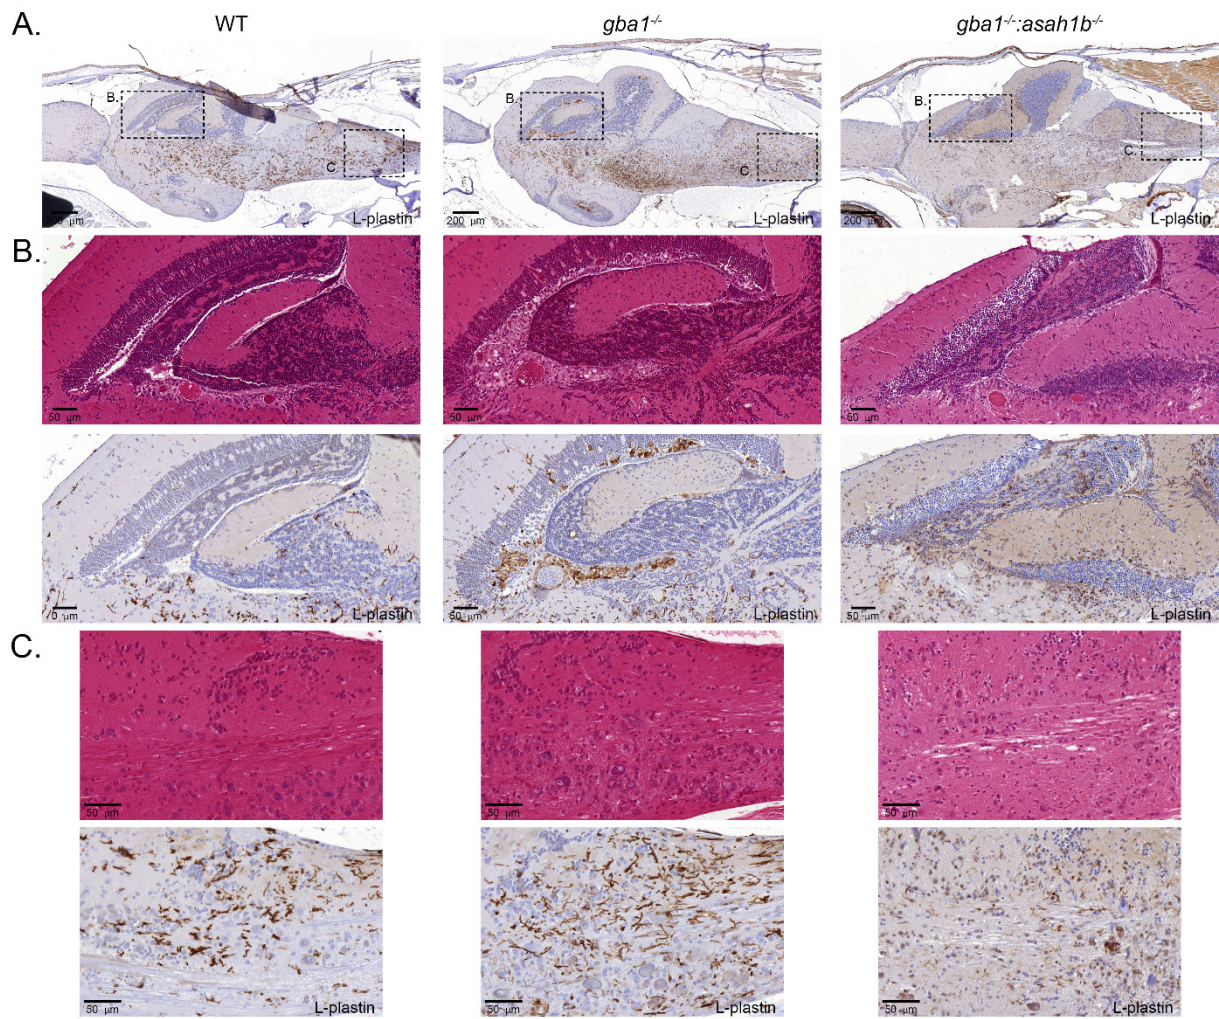

**Supplemental Figure S6:** Histopathology of WT, *gba1*<sup>-/-</sup> and *gba1*<sup>-/-</sup>:*asah1b*<sup>-/-</sup> of sagittal sections of zebrafish brains. **(A)** Immunostaining of L-plastin with low magnification. Scale bars: 200 μm. **(B)** Higher magnification focusing on periventricular grey zone with H&E staining (upper panel) and immunostaining of L-plastin (lower panel). To compare consecutive sections stained with H&E and L-plastin, H&E staining sections were the same as displayed in Figure 6B. Scale bars: 50 μm. **(C)** Higher magnification focusing on the medulla oblongata with H&E staining (upper panel) and immunostaining of L-plastin (lower panel). Scale bars: 50 μm.



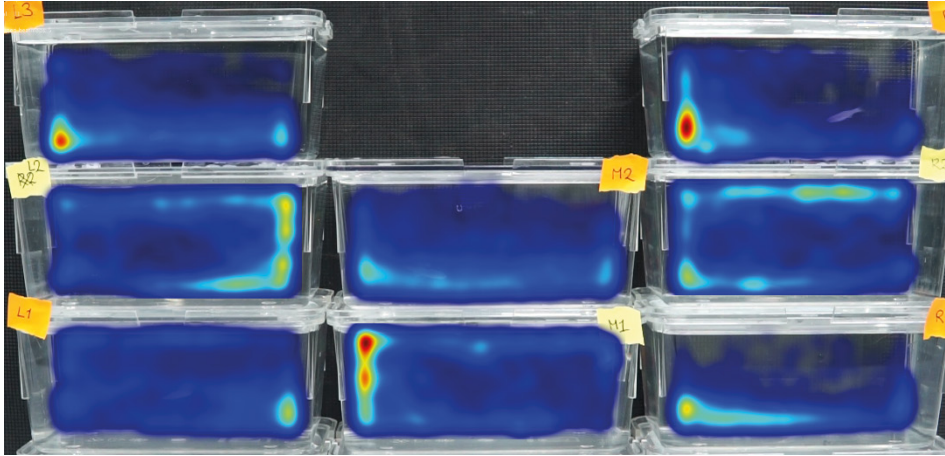

**Supplemental Figure S7: Heatmaps of individually filmed *asah1b*<sup>-/-</sup> and *gba1*<sup>-/-</sup>:*asah1b*<sup>-/-</sup> zebrafish.**

Heatmaps of *asah1b*<sup>-/-</sup> (yellow stickers) and *gba1*<sup>-/-</sup>:*asah1b*<sup>-/-</sup> (orange stickers) at 15 wpf, with individual fish starting to show differences in swimming behaviour. Red indicates more time and blue less time spend at that location.

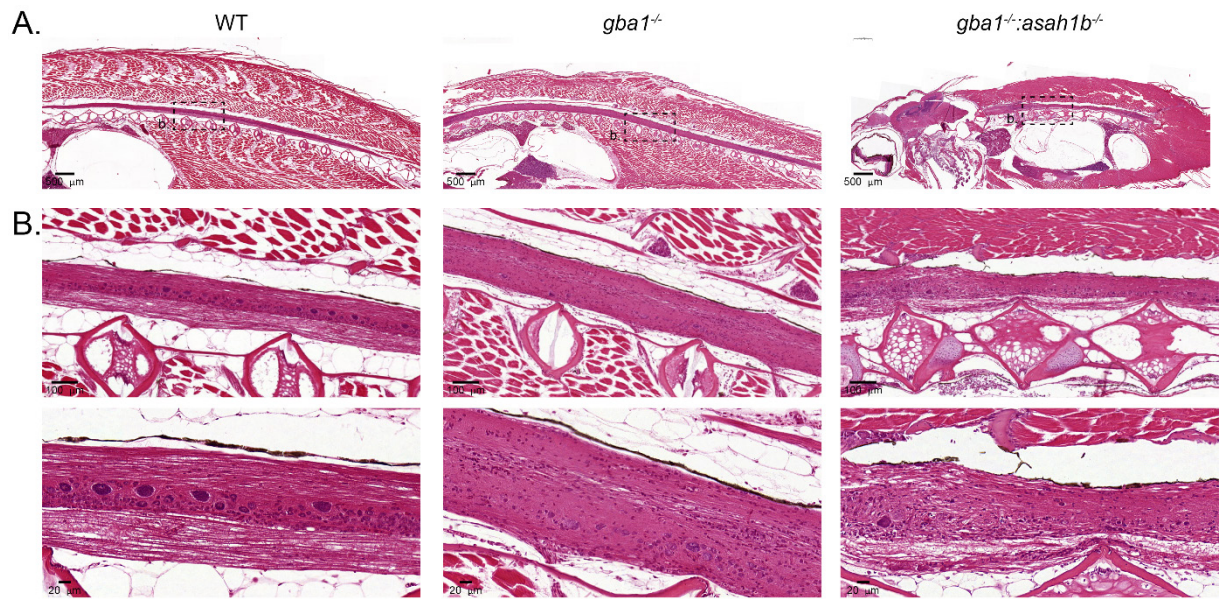

**Supplemental Figure S8:** (A) H&E staining of spinal cords of WT,  $gba1^{-/-}$  and  $gba1^{-/-}:asah1b^{-/-}$  including higher magnifications in (B). Scale bars: 500  $\mu\text{m}$  for (A) and 100  $\mu\text{m}$  and 20  $\mu\text{m}$  for the top and bottom panel in (B).

**Supplemental Video 1** | Short video of WT (white stickers),  $gba1^{-/-}$  (red),  $asah1b^{-/-}$  (yellow) and  $gba1^{-/-}:asah1b^{-/-}$  (orange stickers).

**Supplemental Video 2** | Short video of  $gba1^{-/-}$  (red),  $asah1b^{-/-}$  (yellow) and  $gba1^{-/-}:asah1b^{-/-}$  (orange stickers).

**Supplemental Video 3** | Short video of WT (white stickers),  $asah1b^{-/-}$  (yellow) and  $gba1^{-/-}:asah1b^{-/-}$  (orange stickers).
